1 **Improper Localization of the OmcS Cytochrome May Explain the Inability of the *xapD*-**  
2 **Deficient Mutant of *Geobacter sulfurreducens* to Reduce Fe(III) Oxide**

3

4 Kelly A. Flanagan<sup>1,2\*</sup>, Ching Leang<sup>1,3</sup>, Joy E. Ward<sup>1</sup>, and Derek R. Lovley<sup>1</sup>

5 <sup>1</sup>*Department of Microbiology, University of Massachusetts, Amherst, MA 01003*

6 <sup>2</sup>Current address: Department of Biological Sciences, Mount Holyoke College, 50 College St.,  
7 South Hadley, MA 01075

8 <sup>3</sup>Current address: LanzaTech, 8045 Lamon Ave, Suite 400, Skokie, IL 60077

9 \* corresponding author: [kflanaga@mtholyoke.edu](mailto:kflanaga@mtholyoke.edu)

10 **Abstract**

11 Extracellular electron transfer through a redox-active exopolysaccharide matrix has been  
12 proposed as a strategy for extracellular electron transfer to Fe(III) oxide by *Geobacter*  
13 *sulfurreducens*, based on the phenotype of a *xapD*-deficient strain. Central to this model was the  
14 assertion that the *xapD*-deficient strain produced pili decorated with the multi-heme *c*-type  
15 cytochrome OmcS in manner similar to the wild-type strain. Further examination of the *xapD*-  
16 deficient strain with immunogold labeling of OmcS and transmission electron microscopy  
17 revealed that OmcS was associated with the outer cell surface rather than pili. PilA, the pilus  
18 monomer, could not be detected in the *xapD*-deficient strain under conditions in which it was  
19 readily detected in the wild-type strain. Multiple lines of evidence in previous studies have  
20 suggested that long-range electron transport to Fe(III) oxides proceeds through electrically  
21 conductive pili and that OmcS associated with the pili is necessary for electron transfer from the

22 pili to Fe(III) oxides. Therefore, an alternative explanation for the Fe(III) oxide reduction  
23 phenotype of the *xapD*-deficient strain is that the pili-OmcS route for extracellular electron  
24 transport to Fe(III) oxide has been disrupted in the *xapD*-deficient strain.

## 25 **Introduction**

26 The mechanisms for Fe(III) oxide reduction in *Geobacter* species are of interest because  
27 *Geobacter* species are abundant in diverse environments in which Fe(III) oxide reduction is an  
28 important biogeochemical process<sup>1</sup>. Mechanisms for Fe(III) oxide reduction in *Geobacter*  
29 species have been studied most intensively in *Geobacter sulfurreducens* because it was the first  
30 *Geobacter* species for which tools for genetic manipulation were developed<sup>2</sup>.

31 Two models have been proposed for final steps in Fe(III) oxide reduction by *G.*  
32 *sulfurreducens*, both of which incorporate the previous finding that *Geobacter* species need to be  
33 in direct contact with Fe(III) oxides in order to reduce them<sup>3</sup>. In the exopolysaccharide matrix  
34 model<sup>4</sup>, redox-active moieties, such as *c*-type cytochromes, embedded in a exopolysaccharide  
35 matrix, transfer electrons to Fe(III) oxide that come into contact with the exopolysaccharide  
36 matrix. In the electrically conductive pili (e-pili) model, electrons are transported from the cell  
37 along e-pili and the pili-associated multi-heme *c*-type cytochrome OmcS facilitates electron  
38 transfer from the e-pili to the Fe(III) oxides<sup>1,5</sup>.

39 The e-pili model has been proposed as the simplest explanation for the findings that: 1)  
40 pili are required for Fe(III) oxide reduction<sup>6</sup>; 2) *G. sulfurreducens* pili are highly conductive<sup>6-11</sup>;  
41 3) OmcS, which is not required for electron conduction along the pili<sup>6,7,11,12</sup>, is required for  
42 Fe(III) oxide reduction<sup>13</sup>; and 4) *G. sulfurreducens* strains Aro-5<sup>8</sup> and PA<sup>14</sup>, which each express  
43 pili with low conductivity but with OmcS properly localized on the pili, are highly impaired in

44 Fe(III) oxide reduction. Consistent with this model is the observation that charge injected into  
45 wild-type *G. sulfurreducens* pili propagates along the pili and into the pili-associated  
46 cytochrome<sup>9</sup>.

47 The exopolysaccharide matrix model<sup>4</sup> was proposed after the discovery that deletion of  
48 *xapD* (gene GSU1501), which is necessary for ~50% of exopolysaccharide production, yielded a  
49 strain with diminished capacity for Fe(III) oxide reduction<sup>15</sup>. An important factor in interpreting  
50 the phenotype of the *xapD*-deficient strain was the suggestion that the mutant still produced pili  
51 with attached cytochromes. However, the attachment of cytochromes to the pili was only  
52 indirectly inferred<sup>15</sup> based on findings that protein preparations sheared from the outer surface of  
53 wild-type and *xapD*-deficient cells both contained: 1) a large amount of a heme-staining protein  
54 with the same molecular weight as OmcS and 2) similar bands of a 6 kDa protein in which PilA  
55 was the dominant sequence “(data not shown)”. Given the importance of verifying that OmcS  
56 was properly localized on the e-pili in order to interpret the Fe(III) oxide reduction phenotype of  
57 the *xapD*-deficient strain, the localization of OmcS was evaluated in more detail. The results  
58 demonstrate that deleting genes for outer surface components of *G. sulfurreducens* can have  
59 pleiotropic effects that must be considered when developing models for extracellular electron  
60 transport.

61

## 62 **Materials and Methods**

63 **Source of organism and culturing methods.** The *G. sulfurreducens* strains investigated were  
64 the previously described<sup>16</sup> wild-type strain PCA (ATCC 51573) and the *xapD*-deficient strain<sup>15</sup>.  
65 Cultures were routinely grown under strict anaerobic conditions as previously described<sup>2</sup> at 25°

66 C in NBAF medium with 15 mM acetate as the electron donor and 40 mM fumarate as the  
67 electron acceptor. Studies were conducted with cells harvested in late-log to early stationary  
68 phase because abundant OmcS and pili are produced during this phase of growth on fumarate<sup>17</sup>.

69 **Western blot analysis of OmcS and PilA.** The loosely bound outer surface protein fractions  
70 of the wild-type and *xapD*-deficient strains of *G. sulfurreducens* were isolated as previously  
71 described<sup>13</sup>. Outer surface protein preparations (10 µg) were separated with 12% SDS-PAGE  
72 and blotted onto a PVDF membrane with a semidry transfer cell (Bio-Rad). OmcS was detected  
73 with the previously described antisera<sup>17</sup> and developed with NBT/BCIP. The cellular content of  
74 PilA monomers was evaluated in triplicate samples of wild-type and *xapD*-deficient cultures  
75 harvested at early stationary phase. Whole cell lysates (10 µg) were separated with 15% SDS-  
76 PAGE and blotted onto PVDF. PilA content was detected with Western blot and  
77 chemiluminescence, as previously described<sup>18</sup>.

#### 78 **Immunogold Labeling and Transmission Electron Microscopy.**

79 OmcS was localized with immunogold labeling and transmission electron microscopy as  
80 previously described<sup>17,19</sup>. Briefly, cells were harvested with centrifugation, placed on copper  
81 grids, exposed to rabbit-raised OmcS antibodies, washed, incubated with anti-rabbit IgG  
82 conjugated with 10 nm gold secondary antibody, and then examined with transmission electron  
83 microscopy. For localization of OmcS in ultrathin sections, stationary phase cells were fixed  
84 (2% paraformaldehyde and 0.5% glutaraldehyde in 50 mM PIPES pH 7.2) for an hour, then  
85 washed, dehydrated, and embedded in LR white for sectioning and then immunogold labeled as  
86 previously described<sup>19,20</sup>. These experiments were conducted twice using different cultures, each

87 time with technical replicates to qualitatively observe reproducibility. Over 40 different fields of  
88 view were obtained for each strain.

## 89 **Results and Discussion**

### 90 **Western blot analysis of OmcS and PilA**

91 Western-blot analysis of OmcS in outer surface protein preparations demonstrated that  
92 the *xapD*-deficient strain produced quantities of OmcS comparable to the wild-type strain (Fig  
93 1A). An additional band of slightly higher molecular weight that reacted with the OmcS  
94 antibody was recovered from the *xapD*-deficient mutant, but not in the wild-type strain (Figure  
95 1A). This result raises the possibility that some of the OmcS protein may be modified in the  
96 *xapD*-deficient mutant in a manner not observed in the wild-type strain. Regardless of the  
97 presence of this second band, these results confirm the previously reported<sup>15</sup> production of OmcS  
98 in the *xapD*-deficient mutant and its localization at the outer cell surface.

99 However, we could not confirm that the *xapD*-deficient strain was producing PilA, the  
100 monomer necessary for pili production. No PilA was detected in whole cell lysates of the *xapD*-  
101 deficient strain with Western blots whereas identical conditions readily detected PilA in the wild-  
102 type strain (Fig. 1B).

### 103 **Localization of OmcS**

104 It is difficult to understand how OmcS could be properly localized on e-pili if there is a  
105 lack of the PilA monomer to produce the pili. Therefore, in order to more definitively localize  
106 OmcS, the *xapD*-deficient and wild-type strains were examined with immunogold labeling with  
107 OmcS antibody (Fig. 2). Transmission electron microscopy of whole cell mounts of wild-type

108 cells (Fig. 2A) revealed OmcS localized along pili, as previously reported<sup>17</sup>. In contrast, there  
109 was no immunogold labeling along pili in the *xapD*-deficient strain (Fig. 2B-D). Occasionally a  
110 few gold particles were observed, but they did not appear to be associated with pili (Fig. 2C), but  
111 rather near the outer surface of the cells (Fig. 2D).

112 In order to better define the localization of OmcS in the *xapD*-deficient strain, cells were  
113 further examined in ultrathin sections (Fig. 3). Pili are difficult to visualize with this method, but  
114 in wild-type cells the majority of the OmcS was detected at a distance from the cell, consistent  
115 with localization on pili (Fig. 2A). OmcS was also readily detected in *xapD*-deficient cells, but  
116 was closely associated with the cell surface (Fig. 3B). No OmcS was detected in an OmcS-  
117 deficient mutant (Fig. 3C), as previously reported<sup>17</sup>.

## 118 **Implications**

119 The results suggest that the previous conclusion<sup>15</sup>, based on indirect inference, that the  
120 *xapD*-deficient strain “still produced pili, as well as cytochromes attached to the pili”, is not  
121 correct. This is an important consideration in interpreting of the impact of deleting *xapD* on  
122 Fe(III) oxide reduction. Although it is clear that the *xapD* and related genes influence the  
123 expression of exopolysaccharide in *G. sulfurreducens*<sup>15</sup>, it also apparent that deleting *xapD* has  
124 the pleiotropic effect of mislocalizing OmcS and potentially inhibiting pili production. The  
125 finding that the *xapD*-deficient strain poorly reduces Fe(III) oxide even though there is abundant  
126 OmcS in the extracellular matrix emphasizes the importance of e-pili in properly positioning  
127 OmcS and is consistent with the concept<sup>1,5</sup> that e-pili are a conduit for long-range extracellular  
128 electron transport and that OmcS facilitates electron transfer from e-pili to Fe(II) oxide.

129           Evaluation of the hypothesis that a cytochrome-rich outer-surface expolysaccharide  
130 matrix can also donate electrons to Fe(III) oxide, with an approach in which the  
131 expolysaccharide is diminished with gene mutations, will need to ensure that pleiotropic impacts  
132 on e-pili production and OmcS localization are avoided. Until pili formation in the *xapD*-  
133 deficient strain can be definitely demonstrated, claims for a role of the expolysaccharide in  
134 attachment that is independent of pili participation also warrant scrutiny.

## References

- 1 Lovley, D.R., Ueki, T., Zhang, T., Malvankar, N.S., Shrestha, P.M., Flanagan, K.A., Aklujkar, M., Butler, J.E., Gilteaux, L., Rotaru, A.E., Holmes, D.E., Franks A.E., Orellana, R., Risso, C., Nevin, K.P., *Geobacter*: the microbe electric's physiology, ecology, and practical applications. *Adv Microb Physiol* **59**, 1-100 (2011).
- 2 Coppi, M.V., Leang, C., Sandler, S.J., & Lovley, D.R., Development of a genetic system for *Geobacter sulfurreducens*. *Appl Environ Microbiol* **67**, 3180-3187 (2001).
- 3 Nevin, K.P. & Lovley, D.R., Lack of production of electron-shuttling compounds or solubilization of Fe(III) during reduction of insoluble Fe(III) oxide by *Geobacter metallireducens*. *Appl Environ Microbiol* **66**, 2248-2251 (2000).
- 4 Magnuson, T.S., How the *xap* locus put electrical zap in *Geobacter sulfurreducens* biofilms. *J Bacteriol* **193**, 1021-1022 (2012).
- 5 Lovley, D.R., Live wires: direct extracellular electron exchange for bioenergy and the bioremediation of energy-related contamination. *Energy & Environmental Science* **4**, 4896-4906 (2011).
- 6 Reguera, G. *et al.*, Extracellular electron transfer via microbial nanowires. *Nature* **435**, 1098-1101 (2005).
- 7 Malvankar, N.S. *et al.*, Tunable metallic-like conductivity in microbial nanowire networks. *Nat Nanotechnol* **6**, 573-579 (2011).
- 8 Vargas, M. *et al.*, Aromatic amino acids required for pili conductivity and long-range extracellular electron transport in *Geobacter sulfurreducens*. *MBio* **4**, e00105-13 (2013).



- 9 Malvankar, N.S., Yalcin, S.E., Tuominen, M.T., & Lovley, D.R., Visualization of charge propagation along individual pili proteins using ambient electrostatic force microscopy. *Nat Nano* **9**, 1012-1017 (2014).
- 10 Malvankar, N.S. *et al.*, Structural basis for metallic-like conductivity in microbial nanowires. *MBio* **6**, e00084-15 (2015).
- 11 Adhikari, R.Y., Malvankar, N.S., Tuominen, M.T., & Lovley, D.R., Conductivity of individual *Geobacter* pili. *RSC Advances* **6**, 8354-8357.
- 12 Malvankar, N.S., Tuominen, M.T., & Lovley, D.R., Lack of cytochrome involvement in long-range electron transport through conductive biofilms and nanowires of *Geobacter sulfurreducens*. *Energy & Environmental Science* **5**, 8651-8659 (2012).
- 13 Mehta, T., Coppi, M.V., Childers, S.E., & Lovley, D.R., Outer membrane c-type cytochromes required for Fe(III) and Mn(IV) oxide reduction in *Geobacter sulfurreducens*. *Appl Environ Microbiol* **71**, 8634-8641 (2005).
- 14 Liu, F. *et al.*, Magnetite compensates for the lack of a pilin-associated c-type cytochrome in extracellular electron exchange. *Environmental Microbiology* **17**, 648-655 (2014).
- 15 Rollefson, J.B., Stephen, C.S., Tien, M., & Bond, D.R., Identification of an extracellular polysaccharide network essential for cytochrome anchoring and biofilm formation in *Geobacter sulfurreducens*. *J Bacteriol* **193**, 1023-1033 (2011).
- 16 Caccavo, F., Jr. *et al.*, *Geobacter sulfurreducens* sp. nov., a hydrogen- and acetate-oxidizing dissimilatory metal-reducing microorganism. *Appl Environ Microbiol* **60**, 3752-3759 (1994).

- 17 Leang, C., Qian, X., Mester, T., & Lovley, D.R., Alignment of the c-type cytochrome OmcS along pili of *Geobacter sulfurreducens*. *Appl Environ Microbiol* **76**, 4080-4084 (2010).
- 18 Yi, H. *et al.*, Selection of a variant of *Geobacter sulfurreducens* with enhanced capacity for current production in microbial fuel cells. *Biosensors and Bioelectronics* **24**, 3498-3503 (2009).
- 19 Summers, Z.M. *et al.*, Direct exchange of electrons within aggregates of an evolved syntrophic coculture of anaerobic bacteria. *Science* **330**, 1413-1415 (2010).
- 20 Inoue, K. *et al.*, Specific localization of the c-type cytochrome OmcZ at the anode surface in current-producing biofilms of *Geobacter sulfurreducens*. *Environmental Microbiology Reports* **3**, 211-217 (2010).

## **Additional information**

### Acknowledgements:

We kindly thank Daniel Bond for the *xapD* deletion strain and Dale Callahan for TEM assistance.

### Author contributions:

K.A.F., J.E.W. and D.R.L. designed experiments. K.A.F. ran Western blot analyses. K.A.F. and C.L. viewed whole-mount and ultrathin sections by TEM. J.E.W. conducted confirmatory experiments. K.A.F. and D.R.L. wrote the paper.

### Competing financial interests:

The authors declare no competing financial interests.

**Figure 1. Western-blot analysis revealed presence of OmcS, but not PilA in the *xap*-deficient strain.** A) Anti-OmcS Western blot analysis of loosely bound outer protein fraction, collected from triplicate mid-log cultures. B) Anti-PilA Western blot of whole cell lysates from triplicate, early stationary cultures of the wild-type and *xapD*-deficient strains of *G. sulfurreducens*. “(+)” and “ $\Delta pilA$ ” are positive and negative control samples, respectively; L = ladder.

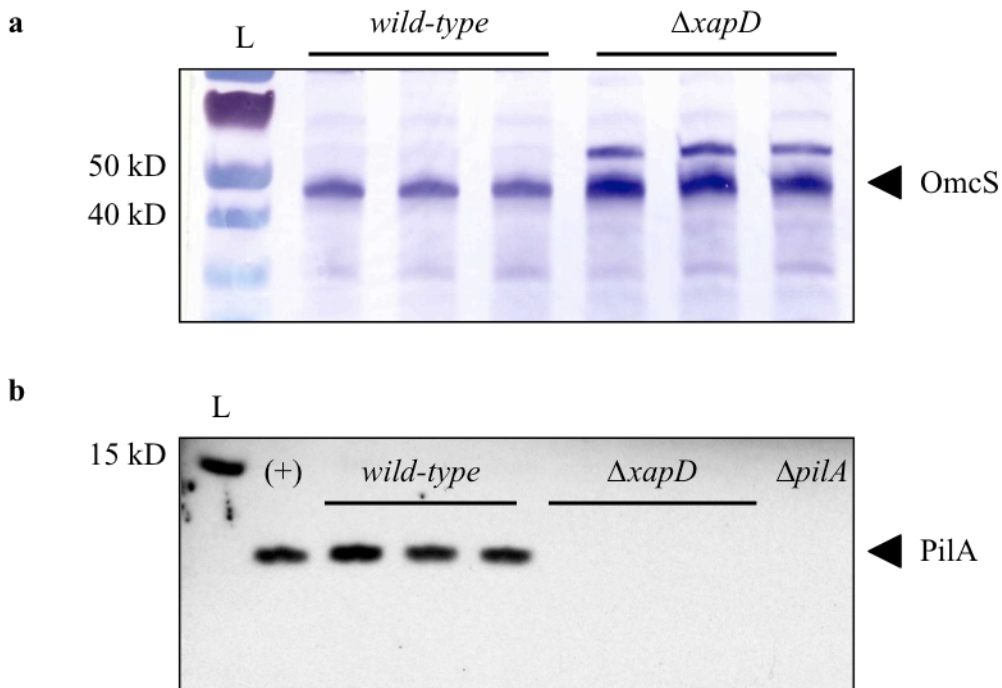

**Figure 2. Transmission electron microscopy of immunogold-labeled whole cell preparations revealed that OmcS was associated with the pili in the wild-type strain of *Geobacter sulfurreducens*, but not in the *xapD*-deficient strain. The presence of OmcS is detectable as a uniform 10 nm electron-dense image. A) Wild-type strain with OmcS-decorated pili. B-D) Lack of OmcS-decorated pili in the *xapD*-deficient strain. Scale bars = 500nm.**

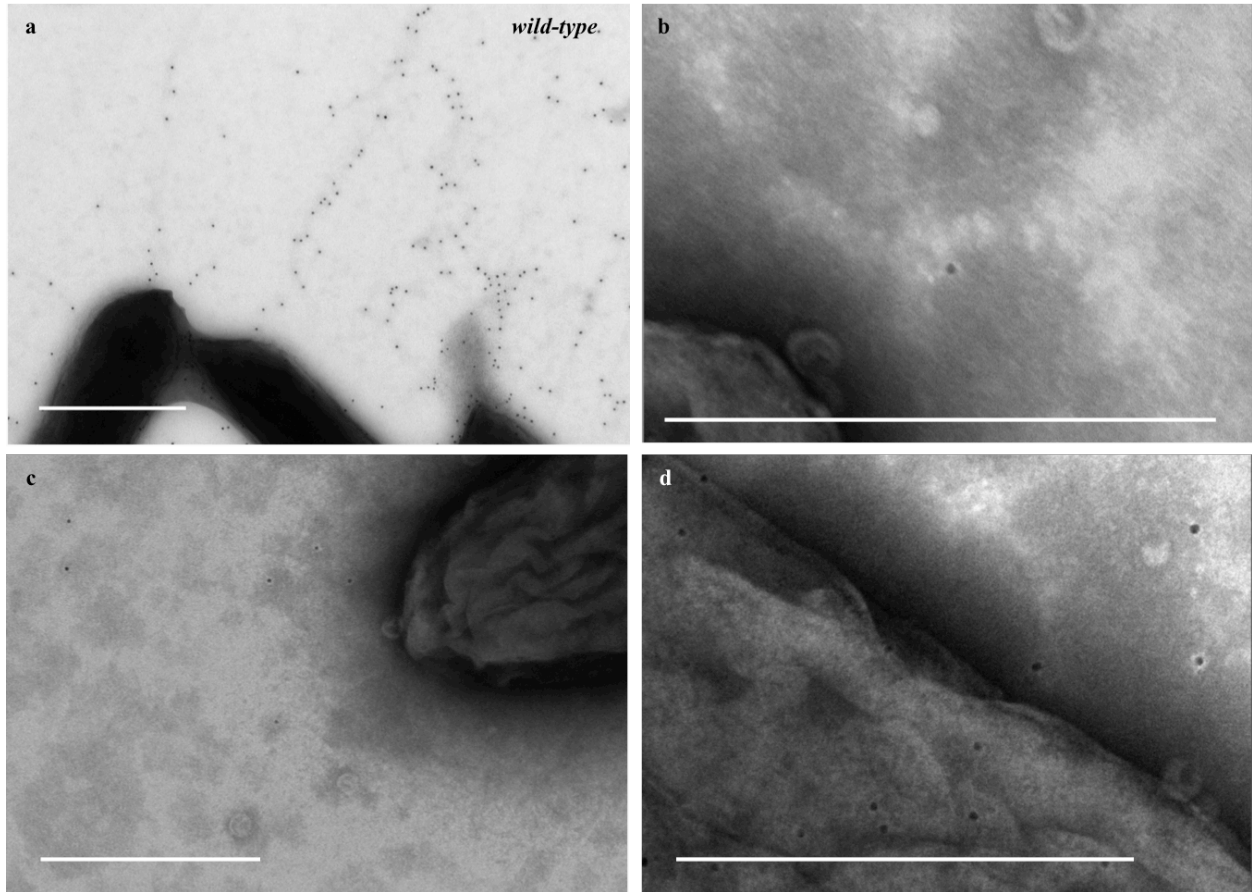

**Figure 3. Transmission electron microscopy of immunogold-labeled thin sections revealed that OmcS was associated with outer cell surface of the *xapD*-deficient strain. A) Wild-type cells. B) *xapD*-deficient strain. C) *omcS*-deficient strain. Scale bars = 500nm.**

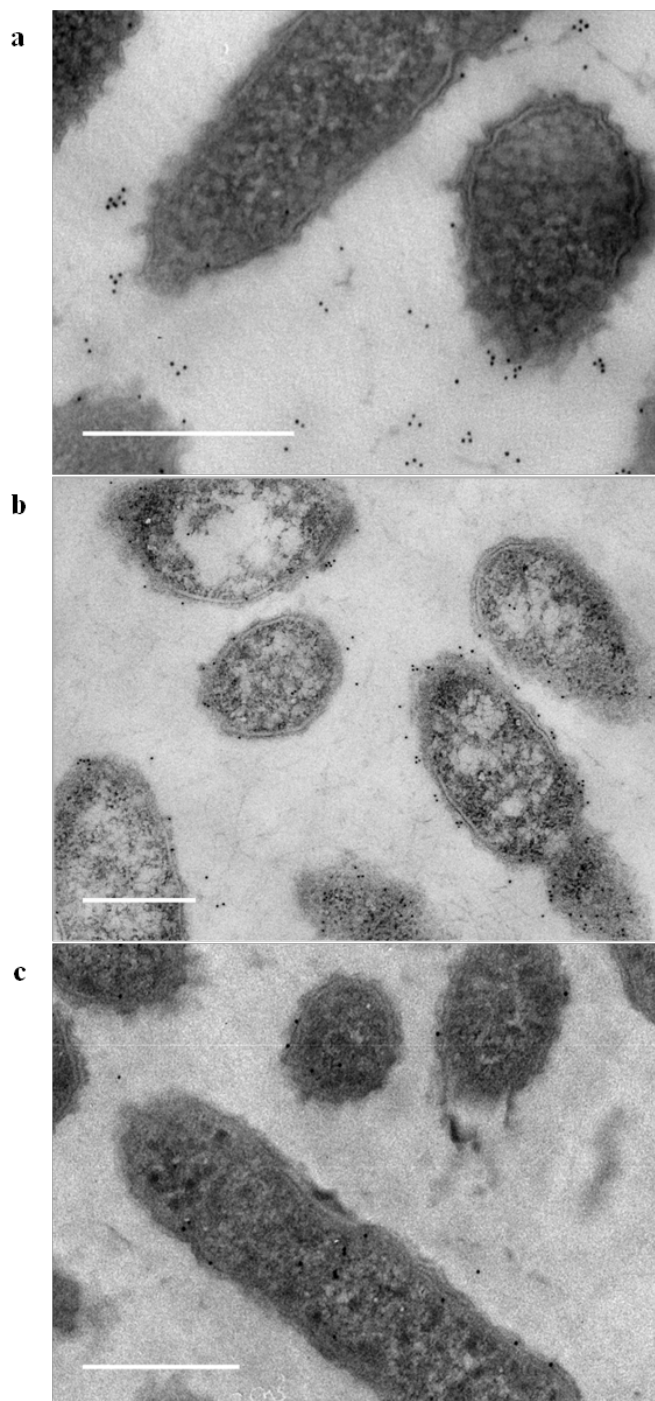

Source: http://www.biorxiv.org/content/10.1101/114900v1.full.pdf
